# Supplementary material
Source: PubMed Central journal article supplement (PMC6051966)
Supplement: HESR-53-2406-s002.pdf [file HESR-53-2406-s002.pdf]

**Supplementary Appendix**  
**The Association of Health Reform and Infant Health: Evidence from Massachusetts**

The following appendix proceeds in two sections. In section 1 we present the results of several alternative models which generally suggested the same set of substantive conclusions as those described in the main text. In the second section we present complete regression results.

**Section 1. Robustness Tests**

Appendix Table 1 presents the results of a test of the parallel trends assumption in the low birth weight model. Using the 2001-2005 data, the low birth weight indicator was regressed on the interaction between Massachusetts and continuous year. The test suggested that the pre-existing trends in Massachusetts were similar to those in the comparison group.

**Appendix Table 1. Parallel Trends Test**

|                 | Coef. | Std. Err. | p value |
|-----------------|-------|-----------|---------|
| Birth Year      | 0.00  | 0.00      | 0.011   |
| Mass            | -0.73 | 0.43      | 0.166   |
| Mass*Birth Year | 0.00  | 0.00      | 0.165   |
| Intercept       | -1.91 | 0.43      | 0.012   |

Source: 2001-2005 birth data. Results come from linear regression of low birth weight.

While the parallel trends test supported the set of chosen comparison states, in Appendix Table 2 (Panel A) we present results when adding Connecticut and New York to the other 4 comparison states. The next set of results describes results when removing Maine and Vermont which both had smaller insurance expansions during the study period. We came to the same conclusion using these alternative comparison groups. Panel B of Appendix Table 2 shows that setting the policy period in reference to the date of conception has no appreciable effects on the results. Panel C shows results for four alternative health outcomes: very low birth weight, pre-term birth, small-for-gestational age, and 5-minute Apgar scores. All three had similar results to birth weight.

Appendix Table 3 presents the results when we restricted the mortality data to be a balanced panel such that each year has the same set of county-by-race cells. The results are nearly identical to those presented in the main paper.

**Appendix Table 2. The Association of Massachusetts Health Reform with the Incidence of Low Birthweight (Percentage Point Change)**

|                                                                       | Est.  | SE   | P-Value |
|-----------------------------------------------------------------------|-------|------|---------|
| <i>Panel A. Alternative Comparison Groups</i>                         |       |      |         |
| <b>Original Comparison States (ME, RI, VT, NH)</b>                    |       |      |         |
| Treat*Implementation                                                  | 0.25  | 0.04 | 0.004   |
| Treat*Post                                                            | 0.10  | 0.14 | 0.527   |
| <b>Add CT and NY</b>                                                  |       |      |         |
| Treat*Implementation                                                  | 0.08  | 0.04 | 0.08    |
| Treat*Post                                                            | 0.05  | 0.05 | 0.35    |
| <b>Add CT and NY, Remove ME and VT</b>                                |       |      |         |
| Treat*Implementation                                                  | 0.07  | 0.03 | 0.12    |
| Treat*Post                                                            | 0.05  | 0.05 | 0.41    |
| <i>Panel B. Setting Policy Period in Reference to Conception Date</i> |       |      |         |
| <b>Original Specification (Birth Year)</b>                            |       |      |         |
| Treat*Implementation                                                  | 0.25  | 0.04 | 0.00    |
| Treat*Post                                                            | 0.10  | 0.14 | 0.53    |
| <b>Year of Conception</b>                                             |       |      |         |
| Treat*Implementation                                                  | 0.14  | 0.04 | 0.03    |
| Treat*Post                                                            | -0.05 | 0.07 | 0.53    |
| <i>Panel C. Alternative Outcomes</i>                                  |       |      |         |
| <b>Very Low Birth Weight (&lt;1500g)</b>                              |       |      |         |
| Treat*Implementation                                                  | -0.07 | 0.03 | 0.078   |
| Treat*Post                                                            | 0.01  | 0.02 | 0.768   |
| <b>Preterm Birth</b>                                                  |       |      |         |
| Treat*Implementation                                                  | 0.01  | 0.09 | 0.94    |
| Treat*Post                                                            | 0.24  | 0.16 | 0.20    |
| <b>Small-for-Gestational Age</b>                                      |       |      |         |
| Treat*Implementation                                                  | 0.30  | 0.12 | 0.07    |
| Treat*Post                                                            | 0.19  | 0.30 | 0.56    |
| <b>5 Minute Apgar Less Than 7</b>                                     |       |      |         |
| Treat*Implementation                                                  | 0.08  | 0.10 | 0.46    |
| Treat*Post                                                            | 0.06  | 0.06 | 0.37    |

Source: 2001-2012 Birth Files and Area Health Resources Files. All estimates are from separate regressions. Coefficients and standard errors have been scaled by 100 to represent percentage point change.

**Appendix Table 3. The Association of Massachusetts Health Reform with Infant Mortality Rates**

|                                          | <b>IRR</b> | <b>SE</b> | <b>P-Value</b> |
|------------------------------------------|------------|-----------|----------------|
| <b>Original Model (Unbalanced Panel)</b> |            |           |                |
| Treat*Implementation                     | 0.981      | 0.051     | 0.714          |
| Treat*Post                               | 1.049      | 0.089     | 0.572          |
| <b>Balanced Panel</b>                    |            |           |                |
| Treat*Implementation                     | 0.983      | 0.052     | 0.739          |
| Treat*Post                               | 1.047      | 0.090     | 0.596          |

Source: 2001-2012 Mortality Files and Area Health Resources Files. All estimates are from separate regressions. IRR represents incident rate ratios and SE are Hubert-White standard errors, clustered on state. Models control for race, county by year, poverty, and unemployment and state and year fixed effects. See appendix for complete regression results.

Appendix Table 4 compares the low birth weight results in full sample as estimated from the linear probability model featured in our main text and the average marginal effects derived from a logistic regression. The results are similar across these two specifications.

**Appendix Table 4. Comparison of Linear Probability Model and Average Marginal Effects from Logistic Regression of Low Birth Weight, Full Sample**

|                                                          | <b>Est.</b> | <b>Se</b> | <b>P-Value</b> |
|----------------------------------------------------------|-------------|-----------|----------------|
| <b>Linear Probability Model</b>                          |             |           |                |
| Treat*Implementation                                     | 0.25        | 0.04      | 0.004          |
| Treat*Post                                               | 0.1         | 0.14      | 0.527          |
| <b>Average Marginal Effects from Logistic Regression</b> |             |           |                |
| Treat*Implementation                                     | 0.024       | 0.04      | <0.001         |
| Treat*Post                                               | 0.1         | 0.17      | 0.500          |

Source: 2001-2012 Birth Files and Area Health Resources Files. All estimates are from separate regressions. Coefficients and standard errors have been scaled by 100 to represent percentage point change. Models adjust for mother's age, race, and marital status, birth order, and county level poverty and unemployment, and year and state fixed effects.

A valid critique of the inference strategy in our main text, based on Huber-White standard errors that have been clustered on state, is that because the cluster size is small our tests are likely to over-reject the null. Given that in our main results we were unable to reject the null, this issue has little bearing on our ultimate conclusions. Nonetheless, in Appendix Table 6 we compare the confidence intervals implied from the clustered standard error approach to the confidence intervals from a studentized wild-cluster bootstrap approach. Wild-cluster bootstrap estimates have previously been shown to perform better than simply clustering on state. We present results from the low-birth weight regressions, for the overall population and for infants born to African-American infants—the group estimated to have the largest post-period effect. Both approaches result in a similar inferential conclusions.

**Appendix Table 5. Comparison of Cluster-Robust and Studentized Wild Cluster Bootstrap Confidence Intervals, Low Birth Weight Regression**

|                                              | Est.  | Cluster-Robust<br>95% CI | Studentized Wild<br>Cluster Bootstrap<br>95% CI |
|----------------------------------------------|-------|--------------------------|-------------------------------------------------|
| <b>Overall Population</b>                    |       |                          |                                                 |
| Treat*Implementation                         | 0.25  | (0.14, 0.36)             | (0.07, 0.42)                                    |
| Treat*Post                                   | 0.1   | (-.30, 0.50)             | (-0.21, 0.40)                                   |
| <b>Non-Hispanic African-American Mothers</b> |       |                          |                                                 |
| Treat*Implementation                         | 0.07  | (-0.64, 0.78)            | (-0.60, 0.71)                                   |
| Treat*Post                                   | -0.34 | (-0.99, 0.31)            | (-0.7, .08)                                     |

Source: 2001-2012 Birth Files and Area Health Resources Files. All estimates are from separate regressions. Coefficients and standard errors have been scaled by 100 to represent percentage point change. Models adjust for mother's age, race, and marital status, birth order, and county level poverty and unemployment.

## **Section 2**

The following section includes the full set of regression results featured in the main paper. The table notes included in the main paper apply to these tables.

**Appendix Table 6. Complete Regression Results, Low Birth Weight Regression, Overall Population**

|               | b     | se   | p     |
|---------------|-------|------|-------|
| MA*Implement  | 0.25  | 0.04 | 0.004 |
| MA*Reform     | 0.10  | 0.14 | 0.527 |
| Age 21-34     | -0.40 | 0.14 | 0.045 |
| Age 35+       | 0.56  | 0.10 | 0.005 |
| Single Mother | 2.53  | 0.04 | 0.000 |
| 2-3 Birth     | -2.08 | 0.08 | 0.000 |
| 4+ Birth      | -0.62 | 0.14 | 0.012 |
| Black, NH     | 3.41  | 0.14 | 0.000 |
| Other, NH     | 1.53  | 0.24 | 0.003 |
| Hispanic      | 1.05  | 0.13 | 0.001 |
| Unemployment  | 0.11  | 0.08 | 0.237 |
| Poverty       | 0.05  | 0.01 | 0.017 |
| MA            | 0.07  | 0.10 | 0.506 |
| NH            | 0.31  | 0.04 | 0.002 |
| RI            | 0.09  | 0.19 | 0.670 |
| VT            | 0.23  | 0.07 | 0.027 |
| 2002          | -0.11 | 0.14 | 0.480 |
| 2003          | -0.06 | 0.23 | 0.817 |
| 2004          | 0.05  | 0.14 | 0.735 |
| 2005          | 0.16  | 0.07 | 0.097 |
| 2006          | 0.04  | 0.14 | 0.791 |
| 2007          | -0.08 | 0.08 | 0.340 |
| 2008          | -0.20 | 0.17 | 0.302 |
| 2009          | -0.60 | 0.42 | 0.223 |
| 2010          | -0.58 | 0.37 | 0.193 |
| 2011          | -0.49 | 0.36 | 0.246 |
| 2012          | -0.46 | 0.33 | 0.234 |
| Intercept     | 4.15  | 0.10 | 0.000 |

**Appendix Table 7. Complete Regression Results, Low Birth Weight Regression, White, NH Population**

|               | b     | se   | p     |
|---------------|-------|------|-------|
| MA*Implement  | 0.32  | 0.09 | 0.020 |
| MA*Reform     | 0.22  | 0.11 | 0.133 |
| Age 21-34     | -0.02 | 0.10 | 0.869 |
| Age 35+       | 0.83  | 0.13 | 0.003 |
| Single Mother | 2.73  | 0.09 | 0.000 |
| 2-3 Birth     | -2.02 | 0.07 | 0.000 |
| 4+ Birth      | -0.63 | 0.13 | 0.008 |
| Black, NH     |       |      |       |
| Other, NH     |       |      |       |
| Hispanic      |       |      |       |
| Unemployment  | 0.09  | 0.06 | 0.191 |
| Poverty       | 0.03  | 0.01 | 0.025 |
| MA            | -0.12 | 0.05 | 0.069 |
| NH            | 0.23  | 0.03 | 0.002 |
| RI            | 0.12  | 0.09 | 0.253 |
| VT            | 0.15  | 0.04 | 0.029 |
| 2002          | -0.13 | 0.17 | 0.510 |
| 2003          | -0.06 | 0.21 | 0.773 |
| 2004          | 0.09  | 0.11 | 0.442 |
| 2005          | 0.18  | 0.08 | 0.074 |
| 2006          | 0.00  | 0.16 | 0.991 |
| 2007          | -0.07 | 0.09 | 0.484 |
| 2008          | -0.25 | 0.15 | 0.175 |
| 2009          | -0.49 | 0.31 | 0.185 |
| 2010          | -0.55 | 0.31 | 0.157 |
| 2011          | -0.33 | 0.31 | 0.351 |
| 2012          | -0.38 | 0.26 | 0.218 |
| Intercept     | 4.07  | 0.09 | 0.000 |

**Appendix Table 8. Complete Regression Results, Low Birth Weight Regression, African American, NH Population**

|               | b     | se   | p     |
|---------------|-------|------|-------|
| MA*Implement  | 0.07  | 0.25 | 0.801 |
| MA*Reform     | -0.34 | 0.23 | 0.220 |
| Age 21-34     | -0.08 | 0.24 | 0.755 |
| Age 35+       | 1.98  | 0.24 | 0.001 |
| Single Mother | 2.37  | 0.18 | 0.000 |
| 2-3 Birth     | -2.48 | 0.06 | 0.000 |
| 4+ Birth      | -0.69 | 0.34 | 0.114 |
| Black, NH     |       |      |       |
| Other, NH     |       |      |       |
| Hispanic      |       |      |       |
| Unemployment  | 0.13  | 0.03 | 0.008 |
| Poverty       | 0.13  | 0.00 | 0.000 |
| MA            | 1.65  | 0.17 | 0.001 |
| NH            | 1.63  | 0.07 | 0.000 |
| RI            | 1.32  | 0.13 | 0.001 |
| VT            | 0.36  | 0.06 | 0.004 |
| 2002          | 0.71  | 0.44 | 0.183 |
| 2003          | 0.58  | 0.15 | 0.017 |
| 2004          | 0.49  | 0.16 | 0.037 |
| 2005          | 0.49  | 0.29 | 0.164 |
| 2006          | 0.73  | 0.42 | 0.160 |
| 2007          | 0.41  | 0.40 | 0.355 |
| 2008          | 0.23  | 0.34 | 0.539 |
| 2009          | -0.77 | 0.49 | 0.193 |
| 2010          | -0.50 | 0.37 | 0.243 |
| 2011          | -0.63 | 0.45 | 0.237 |
| 2012          | -0.31 | 0.38 | 0.468 |
| Intercept     | 4.66  | 0.53 | 0.001 |



**Appendix Table 9. Complete Regression Results, Low Birth Weight Regression, Hispanic Population**

|               | b     | se   | p     |
|---------------|-------|------|-------|
| MA*Implement  | 0.32  | 0.28 | 0.324 |
| MA*Reform     | -0.33 | 0.22 | 0.208 |
| Age 21-34     | -2.03 | 0.98 | 0.108 |
| Age 35+       | -1.34 | 1.03 | 0.263 |
| Single Mother | 2.56  | 0.32 | 0.001 |
| 2-3 Birth     | -2.19 | 0.09 | 0.000 |
| 4+ Birth      | -0.44 | 0.65 | 0.534 |
| Black, NH     |       |      |       |
| Other, NH     |       |      |       |
| Hispanic      |       |      |       |
| Unemployment  | 0.25  | 0.14 | 0.155 |
| Poverty       | 0.02  | 0.06 | 0.813 |
| MA            | 1.97  | 0.23 | 0.001 |
| NH            | 1.14  | 0.26 | 0.012 |
| RI            | 1.43  | 0.18 | 0.001 |
| VT            | 1.88  | 0.21 | 0.001 |
| 2002          | -0.30 | 0.73 | 0.698 |
| 2003          | -0.23 | 0.63 | 0.739 |
| 2004          | -0.55 | 0.81 | 0.534 |
| 2005          | 0.08  | 0.37 | 0.839 |
| 2006          | -0.30 | 0.62 | 0.650 |
| 2007          | 0.08  | 0.60 | 0.898 |
| 2008          | 0.14  | 0.57 | 0.825 |
| 2009          | -1.05 | 1.10 | 0.393 |
| 2010          | -0.58 | 0.88 | 0.547 |
| 2011          | -0.57 | 0.81 | 0.521 |
| 2012          | -0.67 | 0.57 | 0.307 |
| Intercept     | 5.49  | 1.51 | 0.022 |

**Appendix Table 10. Complete Regression Results, Low Birth Weight Regression, Single Mother Population**

|               | b     | se   | p     |
|---------------|-------|------|-------|
| MA*Implement  | 0.13  | 0.08 | 0.166 |
| MA*Reform     | -0.23 | 0.14 | 0.168 |
| Age 21-34     | -0.83 | 0.18 | 0.009 |
| Age 35+       | 1.08  | 0.10 | 0.000 |
| Single Mother |       |      |       |
| 2-3 Birth     | -1.19 | 0.09 | 0.000 |
| 4+ Birth      | 1.11  | 0.27 | 0.014 |
| Black, NH     | 2.90  | 0.15 | 0.000 |
| Other, NH     | 1.54  | 0.42 | 0.022 |
| Hispanic      | 0.34  | 0.15 | 0.090 |
| Unemployment  | 0.09  | 0.11 | 0.483 |
| Poverty       | 0.08  | 0.01 | 0.000 |
| MA            | 0.64  | 0.12 | 0.007 |
| NH            | 0.47  | 0.15 | 0.036 |
| RI            | 0.20  | 0.26 | 0.480 |
| VT            | 0.38  | 0.13 | 0.045 |
| 2002          | -0.10 | 0.18 | 0.608 |
| 2003          | -0.19 | 0.41 | 0.659 |
| 2004          | 0.11  | 0.16 | 0.512 |
| 2005          | 0.15  | 0.23 | 0.559 |
| 2006          | 0.20  | 0.25 | 0.475 |
| 2007          | -0.34 | 0.18 | 0.131 |
| 2008          | -0.18 | 0.36 | 0.645 |
| 2009          | -0.47 | 0.66 | 0.516 |
| 2010          | -0.54 | 0.55 | 0.381 |
| 2011          | -0.60 | 0.56 | 0.344 |
| 2012          | -0.40 | 0.44 | 0.409 |
| Intercept     | 6.20  | 0.24 | 0.000 |

**Appendix Table 11. Complete Regression Results, Low Birth Weight Regression, High school or Less Population**

|               | b     | se   | p     |
|---------------|-------|------|-------|
| MA*Implement  | 0.10  | 0.05 | 0.102 |
| MA*Reform     | 0.07  | 0.17 | 0.703 |
| Age 21-34     | 0.02  | 0.19 | 0.933 |
| Age 35+       | 1.85  | 0.19 | 0.001 |
| Single Mother | 2.18  | 0.10 | 0.000 |
| 2-3 Birth     | -2.12 | 0.13 | 0.000 |
| 4+ Birth      | -0.51 | 0.24 | 0.099 |
| Black, NH     | 2.68  | 0.38 | 0.002 |
| Other, NH     | 0.99  | 0.31 | 0.034 |
| Hispanic      | 0.14  | 0.19 | 0.521 |
| Unemployment  | 0.12  | 0.13 | 0.409 |
| Poverty       | 0.06  | 0.03 | 0.088 |
| MA            | 0.56  | 0.18 | 0.035 |
| NH            | 0.49  | 0.04 | 0.000 |
| RI            | 0.39  | 0.23 | 0.161 |
| VT            | 0.69  | 0.06 | 0.000 |
| 2002          | -0.09 | 0.17 | 0.620 |
| 2003          | 0.01  | 0.41 | 0.984 |
| 2004          | 0.10  | 0.21 | 0.662 |
| 2005          | 0.15  | 0.17 | 0.423 |
| 2006          | 0.13  | 0.24 | 0.619 |
| 2007          | 0.04  | 0.06 | 0.546 |
| 2008          | -0.12 | 0.31 | 0.713 |
| 2009          | -0.55 | 0.66 | 0.452 |
| 2010          |       |      |       |
| 2011          |       |      |       |
| 2012          |       |      |       |
| Intercept     | 4.39  | 0.13 | 0.000 |

**Appendix Table 12. Transformed Negative Binomial  
Regression Coefficients, Overall Population**

---

|                   | IRR   | se    | p     |
|-------------------|-------|-------|-------|
| MA*Implement      | 0.981 | 0.051 | 0.714 |
| MA*Reform         | 1.049 | 0.089 | 0.572 |
| Poverty Rate      | 1.011 | 0.008 | 0.168 |
| Unemployment Rate | 1.073 | 0.047 | 0.105 |
| Black, NH         | 2.421 | 0.140 | 0.000 |
| Other             | 1.545 | 0.064 | 0.000 |
| 2002              | 0.843 | 0.032 | 0.000 |
| 2003              | 0.774 | 0.052 | 0.000 |
| 2004              | 0.873 | 0.051 | 0.020 |
| 2005              | 0.928 | 0.074 | 0.350 |
| 2006              | 0.950 | 0.092 | 0.596 |
| 2007              | 0.892 | 0.057 | 0.076 |
| 2008              | 0.773 | 0.081 | 0.014 |
| 2009              | 0.636 | 0.136 | 0.035 |
| 2010              | 0.600 | 0.117 | 0.009 |
| 2011              | 0.653 | 0.162 | 0.085 |
| 2012              | 0.593 | 0.116 | 0.007 |
| MA                | 0.610 | 0.038 | 0.000 |
| NH                | 0.893 | 0.017 | 0.000 |
| RI                | 0.750 | 0.061 | 0.000 |
| VT                | 0.965 | 0.034 | 0.314 |
| Constant          | 0.004 | 0.000 | 0.000 |

---

**Appendix Table 13. Transformed Negative Binomial  
Regression Coefficients, White, NH Population**

---

|                   | IRR   | se    | p     |
|-------------------|-------|-------|-------|
| MA*Implement      | 1.044 | 0.065 | 0.494 |
| MA*Reform         | 1.019 | 0.052 | 0.716 |
| Poverty Rate      | 1.008 | 0.008 | 0.324 |
| Unemployment Rate | 1.060 | 0.032 | 0.051 |
| 2002              | 0.833 | 0.041 | 0.000 |
| 2003              | 0.771 | 0.040 | 0.000 |
| 2004              | 0.893 | 0.053 | 0.055 |
| 2005              | 0.961 | 0.065 | 0.559 |
| 2006              | 0.983 | 0.099 | 0.865 |
| 2007              | 0.876 | 0.077 | 0.130 |
| 2008              | 0.785 | 0.065 | 0.003 |
| 2009              | 0.726 | 0.092 | 0.012 |
| 2010              | 0.659 | 0.070 | 0.000 |
| 2011              | 0.766 | 0.123 | 0.097 |
| 2012              | 0.669 | 0.065 | 0.000 |
| MA                | 0.579 | 0.024 | 0.000 |
| NH                | 0.853 | 0.012 | 0.000 |
| RI                | 0.697 | 0.034 | 0.000 |
| VT                | 0.928 | 0.018 | 0.000 |
| Constant          | 0.004 | 0.000 | 0.000 |

---

**Appendix Table 14. Transformed Negative Binomial Regression Coefficients, African American, NH Population**

---

|                   | IRR   | se    | p     |
|-------------------|-------|-------|-------|
| MA*Implement      | 1.039 | 0.167 | 0.811 |
| MA*Reform         | 0.925 | 0.268 | 0.788 |
| Poverty Rate      | 1.007 | 0.003 | 0.015 |
| Unemployment Rate | 1.107 | 0.067 | 0.092 |
| 2002              | 0.809 | 0.139 | 0.217 |
| 2003              | 0.820 | 0.106 | 0.125 |
| 2004              | 0.794 | 0.099 | 0.063 |
| 2005              | 0.794 | 0.118 | 0.121 |
| 2006              | 0.887 | 0.190 | 0.574 |
| 2007              | 0.938 | 0.157 | 0.705 |
| 2008              | 0.941 | 0.274 | 0.834 |
| 2009              | 0.514 | 0.287 | 0.234 |
| 2010              | 0.512 | 0.300 | 0.253 |
| 2011              | 0.443 | 0.251 | 0.150 |
| 2012              | 0.469 | 0.236 | 0.133 |
| MA                | 0.965 | 0.210 | 0.869 |
| NH                | 1.246 | 0.027 | 0.000 |
| RI                | 1.053 | 0.183 | 0.766 |
| VT                | 2.001 | 0.081 | 0.000 |
| Constant          | 0.005 | 0.000 | 0.000 |

---

**Appendix Table 15. Transformed Negative Binomial  
Regression Coefficients, All Other Mothers**

---

|                   | IRR   | se    | p     |
|-------------------|-------|-------|-------|
| MA*Implement      | 0.810 | 0.021 | 0.000 |
| MA*Reform         | 1.653 | 0.488 | 0.089 |
| Poverty Rate      | 1.007 | 0.009 | 0.418 |
| Unemployment Rate | 1.159 | 0.085 | 0.044 |
| 2002              | 0.802 | 0.105 | 0.091 |
| 2003              | 0.672 | 0.109 | 0.014 |
| 2004              | 0.804 | 0.159 | 0.271 |
| 2005              | 0.862 | 0.097 | 0.189 |
| 2006              | 0.862 | 0.088 | 0.143 |
| 2007              | 0.899 | 0.111 | 0.390 |
| 2008              | 0.464 | 0.165 | 0.031 |
| 2009              | 0.295 | 0.168 | 0.032 |
| 2010              | 0.303 | 0.181 | 0.045 |
| 2011              | 0.329 | 0.182 | 0.045 |
| 2012              | 0.318 | 0.181 | 0.044 |
| MA                | 0.658 | 0.068 | 0.000 |
| NH                | 1.045 | 0.036 | 0.197 |
| RI                | 0.877 | 0.072 | 0.113 |
| VT                | 0.843 | 0.066 | 0.030 |
| Constant          | 0.004 | 0.001 | 0.000 |

---
